# Supplementary material
Source: PubMed Central journal article supplement (PMC4484586)
Supplement: NIHMS702383-supplement-2.pdf [file NIHMS702383-supplement-2.pdf]

ATVB Online Supplement

**The Relationship of Cigarette Smoking with Inflammation and Subclinical Vascular Disease: The Multi-Ethnic Study of Atherosclerosis.**

*McEvoy. Smoking, inflammation, and atherosclerosis*

**Supplementary E-Table I: Reclassification of smoking status based on Urinary Cotinine**

|                                                            |                            | Smoking Status by Self Report |               |                |                     |
|------------------------------------------------------------|----------------------------|-------------------------------|---------------|----------------|---------------------|
|                                                            | Number<br>(% reclassified) | Never Smoker                  | Former Smoker | Current Smoker | <b><i>Total</i></b> |
| Smoking Status<br>Corrected by<br>Urine Cotinine<br>Levels | Never Smoker               | 3218                          | 0             | 0              | <b><i>3218</i></b>  |
|                                                            | Former Smoker              | 175 (2.6%)                    | 2432          | 0              | <b><i>2607</i></b>  |
|                                                            | Current Smoker             | 28 (0.4%)                     | 56 (0.8%)     | 887            | <b><i>971</i></b>   |
|                                                            | <i>Total</i>               | 3421                          | 2488          | 887            | <b><i>6796</i></b>  |

Never smokers at the baseline visit who reported being former smokers at MESA visit 2 were reclassified as baseline former smokers. In subjects with urinary cotinine values (n=3,965), former-smokers and never-smokers with cotinine levels >500ng/mL were reclassified as current-smokers.

**Supplementary E-Table II: Association of Smoking Status with Domains of CVD, with and without adjustment for Alcohol, Fever and Anti-inflammatory medications\***

|                                              | Model Covariates                                                                       | SMOKING STATUS |                            |                               |
|----------------------------------------------|----------------------------------------------------------------------------------------|----------------|----------------------------|-------------------------------|
|                                              |                                                                                        | Never Smokers  | Former Smokers             | Current Smokers               |
| <b>Inflammation</b>                          |                                                                                        |                |                            |                               |
| hsCRP,<br>β-Coefficient ‡                    | Base Model *                                                                           | 0 (ref)        | <b>0.08 (0.02 to 0.14)</b> | <b>0.31 (0.23 to 0.38)   </b> |
|                                              | Base Model +Alcohol status and calories +Recent Fever + Anti-inflammatory medications† | 0 (ref)        | <b>0.08 (0.02 to 0.14)</b> | <b>0.31 (0.23 to 0.39)   </b> |
| IL-6,<br>β-Coefficient ‡                     | Base Model *                                                                           | 0 (ref)        | <b>0.06 (0.02 to 0.09)</b> | <b>0.18 (0.14 to 0.23)   </b> |
|                                              | Base Model +Alcohol status and calories +Recent Fever + Anti-inflammatory medications† | 0 (ref)        | <b>0.05 (0.02 to 0.08)</b> | <b>0.19 (0.14 to 0.23)   </b> |
| <b>Vascular Function</b>                     |                                                                                        |                |                            |                               |
| Carotid Distensibility,<br>β-Coefficient §   | Base Model *                                                                           | 0 (ref)        | 0.03 (-0.01 to 0.07)       | <b>0.18 (0.12 to 0.23)   </b> |
|                                              | Base Model +Alcohol status and calories +Recent Fever + Anti-inflammatory medications† | 0 (ref)        | 0.02 (-0.02 to 0.06)       | <b>0.17 (0.11 to 0.23)   </b> |
| Aortic Distensibility,<br>β-Coefficient ‡, § | Base Model *                                                                           | 0 (ref)        | -0.01 (-0.04 to 0.03)      | <b>-0.05 (-0.10 to -0.01)</b> |
|                                              | Base Model +Alcohol status and calories +Recent Fever + Anti-inflammatory medications† | 0 (ref)        | -0.01 (-0.05 to 0.03)      | <b>-0.06 (-0.11 to -0.01)</b> |
| Flow-Mediated Dilation,<br>β-Coefficient §   | Base Model *                                                                           | 0 (ref)        | 0.13 (-0.08 to 0.35)       | 0.02 (-0.27 to 0.32)          |
|                                              | Base Model +Alcohol status and calories +Recent Fever + Anti-inflammatory medications† | 0 (ref)        | 0.09 (-0.14 to 0.31)       | -0.03 (-0.33 to 0.27)         |

| <b>Subclinical Atherosclerosis</b> |                                                                                        |         |                               |                               |
|------------------------------------|----------------------------------------------------------------------------------------|---------|-------------------------------|-------------------------------|
| CIMT, $\beta$ -Coefficient         | Base Model *                                                                           | 0 (ref) | <b>0.05 (0.03 to 0.07)</b>    | <b>0.09 (0.06 to 0.12)</b>    |
|                                    | Base Model +Alcohol status and calories +Recent Fever + Anti-inflammatory medications† | 0 (ref) | <b>0.04 (0.02 to 0.07)</b>    | <b>0.07 (0.03 to 0.13)</b>    |
| CAC>0, Odds Ratio,                 | Base Model *                                                                           | 1 (ref) | <b>1.38 (1.21 to 1.57)   </b> | <b>1.79 (1.49 to 2.14)   </b> |
|                                    | Base Model +Alcohol status and calories +Recent Fever + Anti-inflammatory medications† | 1 (ref) | <b>1.40 (1.22 to 1.60)   </b> | <b>1.81 (1.50 to 2.17)   </b> |
| ABI <1, Odds Ratio                 | Base Model *                                                                           | 1 (ref) | <b>1.24 (1.02 to 1.50)</b>    | <b>2.22 (1.74 to 2.83)   </b> |
|                                    | Base Model +Alcohol status and calories +Recent Fever + Anti-inflammatory medications† | 1 (ref) | <b>1.19 (0.97 to 1.45)</b>    | <b>2.19 (1.70 to 2.81)   </b> |

\*All values are expressed as Odds Ratios or  $\beta$ -Coefficients; with 95% confidence Intervals. The base model is adjusted for age, gender, race, MESA site, BMI, hypertension status, diabetes status, heart rate, LDL-C, HDL-C, triglycerides, treatment for dyslipidemia, family history of MI, and level of education.

† Anti-inflammatory medications (yes/no for reported current use of either aspirin, NSAIDs, or steroids)

‡ Log-transformed § See Table 1 for sample sizes

**Significant values (P<0.05) are presented in bold.**

**|| P-value <0.001**

**Supplementary E-Table III: Smoking and Domains of subclinical CVD; stratified by Gender\***

|                                             | MALE          |                            |                                 | FEMALE†       |                               |                               | Interaction p-value |
|---------------------------------------------|---------------|----------------------------|---------------------------------|---------------|-------------------------------|-------------------------------|---------------------|
|                                             | Never Smokers | Former Smokers             | Current Smokers                 | Never Smokers | Former Smokers                | Current Smokers               |                     |
| <b>Inflammation</b>                         |               |                            |                                 |               |                               |                               |                     |
| hsCRP ≥2mg/L, Odds Ratio                    | 1 (ref)       | 1.16 (0.96 to 1.39)        | <b>2.10 (1.63 to 2.70)   </b>   | 1 (ref)       | 1.21 (0.99 to 1.46)           | <b>1.34 (1.02 to 1.75)</b>    | 0.12                |
| hsCRP, β-Coefficient ‡                      | 0 (ref)       | 0.05 (-0.02 to 0.13)       | <b>0.39 (0.28 to 0.50)   </b>   | 0 (ref)       | 0.06 (-0.02 to 0.14)          | <b>0.16 (0.04 to 0.28)</b>    | 0.17                |
| IL-6, β-Coefficient ‡                       | 0 (ref)       | <b>0.07 (0.02 to 0.11)</b> | <b>0.22 (0.15 to 0.29)   </b>   | 0 (ref)       | 0.04 (-0.01 to 0.88)          | <b>0.13 (0.07 to 0.20)   </b> | 0.21                |
| Fibrinogen, β-Coefficient                   | 0 (ref)       | -2.87 (-7.78 to 2.05)      | <b>16.25 (9.48 to 23.02)   </b> | 0 (ref)       | -4.79 (-10.24 to 0.66)        | 2.89 (-4.58 to 10.37)         | <b>0.01</b>         |
| <b>Vascular Function</b>                    |               |                            |                                 |               |                               |                               |                     |
| Carotid Distensibility, β-Coefficient §     | 0 (ref)       | 0.01 (-0.05 to 0.07)       | <b>0.13 (0.04 to 0.21)</b>      | 0 (ref)       | 0.02 (-0.03 to 0.08)          | <b>0.22 (0.14 to 0.30)   </b> | 0.17                |
| Aortic Distensibility, β-Coefficient ‡, §   | 0 (ref)       | 0.01 (-0.04 to 0.06)       | <b>-0.07 (-0.01 to -0.14)</b>   | 0 (ref)       | -0.05 (-0.10 to 0.01)         | -0.02 (-0.10 to 0.06)         | 0.95                |
| Flow-Mediated Dilation, β-Coefficient §     | 0 (ref)       | 0.02 (-0.26 to 0.31)       | 0.15 (-0.24 to 0.54)            | 0 (ref)       | 0.24 (-0.11 to 0.60)          | -0.07 (-0.54 to 0.39)         | 0.50                |
| <b>Subclinical Atherosclerosis</b>          |               |                            |                                 |               |                               |                               |                     |
| CAC>0, Odds Ratio,                          | 1 (ref)       | <b>1.30 (1.08 to 1.53)</b> | <b>1.61 (1.24 to 2.09)   </b>   | 1 (ref)       | <b>1.62 (1.33 to 1.98)   </b> | <b>2.21 (1.69 to 2.89)   </b> | 0.19                |
| CAC >75 <sup>th</sup> centile, Odds Ratio § | 1 (ref)       | 1.04 (0.82 to 1.31)        | 1.29 (0.93 to 1.78)             | 1 (ref)       | 1.33 (0.98 to 1.79)           | <b>1.54 (1.00 to 2.37)</b>    | <b>0.04</b>         |
| ABI<1, Odds Ratio                           | 1 (ref)       | 1.30 (0.91 to 1.86)        | <b>2.73 (1.76 to 4.23)   </b>   | 1 (ref)       | 1.14 (0.89 to 1.46)           | <b>2.12 (1.54 to 2.92)   </b> | 0.41                |

\*All values are expressed as Odds Ratios or β-Coefficients; with 95% confidence Intervals. Each robust linear and logistic model is adjusted for age, gender, race, MESA site, BMI, hypertension status, diabetes status, heart rate, LDL-C, HDL-C, triglycerides, treatment for dyslipidemia, family history of MI, and level of education.

†For the stratified analysis in females we also controlled for Hormone-Replacement Therapy status in the fully adjusted model

‡ Log-transformed § See Table 1 for sample sizes

**Significant values (P<0.05) are presented in bold.**

**|| P-value <0.001**

**Supplementary E-Table IV: Smoking, inflammation and atherosclerosis; stratified by Ethnicity**

|                                                       | Former Smokers*†           | Current Smokers*†          |
|-------------------------------------------------------|----------------------------|----------------------------|
| <b>hsCRP, <math>\beta</math>-Coefficient, ‡</b>       |                            |                            |
| White                                                 | 0.04 (-0.05, 0.13)         | <b>0.33 (0.19, 0.46) §</b> |
| Chinese American                                      | 0.03 (-0.16, 0.21)         | 0.17 (-0.11, 0.44)         |
| African American                                      | <b>0.14 (0.03, 0.26)</b>   | <b>0.37 (0.22, 0.51) §</b> |
| Hispanic                                              | 0.02 (-0.10, 0.14)         | 0.15 (-0.01, 0.31)         |
| <i>Smoking-ethnicity interaction, p=0.89</i>          |                            |                            |
| <b>hsCRP <math>\geq</math>2mg/L, Odds Ratio</b>       |                            |                            |
| White                                                 | 1.14 (0.94, 1.38)          | <b>1.91 (1.41, 2.59) §</b> |
| Chinese American                                      | 1.09 (0.61, 1.94)          | 0.94 (0.39-2.26)           |
| African American                                      | <b>1.40 (1.10, 1.77)</b>   | <b>2.04 (1.48, 2.82) §</b> |
| Hispanic                                              | 1.07 (0.82, 1.39)          | 1.30 (0.90, 1.87)          |
| <i>Smoking-ethnicity interaction, p=0.96</i>          |                            |                            |
| <b>CAC&gt;0, Odds Ratio,</b>                          |                            |                            |
| White                                                 | <b>1.37 (1.11, 1.68)</b>   | <b>2.00 (1.45, 2.76) §</b> |
| Chinese American                                      | 0.98 (0.60, 1.57)          | 1.03 (0.50-2.09)           |
| African American                                      | <b>1.43 (1.12, 1.82)</b>   | <b>1.91 (1.41, 2.60) §</b> |
| Hispanic                                              | <b>1.74 (1.29, 2.33) §</b> | <b>1.77 (1.18, 2.65)</b>   |
| <i>Smoking-ethnicity interaction, p=0.92</i>          |                            |                            |
| <b>CAC &gt;75<sup>th</sup> Percentile, Odds Ratio</b> |                            |                            |
| White                                                 | 1.28 (0.99, 1.66)          | <b>1.56 (1.07, 2.30)</b>   |
| Chinese American                                      | 1.18 (0.62, 2.27)          | 0.41 (0.15, 1.10)          |
| African American                                      | 1.41 (0.97, 2.06)          | 1.45 (0.89, 2.36)          |
| Hispanic                                              | 0.87 (0.58, 1.30)          | <b>1.93 (1.06, 3.52)</b>   |
| <i>Smoking-ethnicity interaction, p=0.80</i>          |                            |                            |
| <b>ABI &lt;1.0, Odds Ratio</b>                        |                            |                            |
| White                                                 | <b>1.62 (1.17, 2.23)</b>   | <b>2.73 (1.78, 4.18) §</b> |
| Chinese American                                      | 1.59 (0.56, 4.55)          | 0.53 (0.06, 4.58)          |
| African American                                      | 1.24 (0.91, 1.68)          | <b>2.15 (1.48, 3.10) §</b> |
| Hispanic                                              | 0.57 (0.33, 1.00)          | <b>1.90 (1.00, 3.61)</b>   |
| <i>Smoking-ethnicity interaction, p=0.11</i>          |                            |                            |

\*All values are compared to Never Smokers and expressed as Odds Ratios or  $\beta$ -Coefficients; with 95% Confidence Intervals and p-values. The  $\beta$ -Coefficient should be interpreted as the absolute adjusted difference in a variable compared to never smokers.

† Adjusted for age, gender, MESA site, BMI, hypertension status, diabetes status, heart rate, LDL-C, HDL-C, triglycerides, treatment for dyslipidemia, family history of MI, and level of education. Race removed from model.

‡ Log transformed

**Significant values (P<0.05) are presented in bold.** Abbreviations and sample numbers per Table 1.

**§ P-value <0.001**

**Supplementary E-Table V- Association of Smoking Cessation Interval with Domains of CVD, after further correction for pack-years\***

|                                        | <b>Former Smokers-<br/>1-yr quit interval</b> | <b>Former Smokers-<br/>1-yr quit interval<br/>further corrected for<br/>pack-years</b> | <b>Former Smokers-<br/>5-yr quit interval</b> | <b>Former Smokers-<br/>5-yr quit interval<br/>further corrected<br/>for pack-years</b> |
|----------------------------------------|-----------------------------------------------|----------------------------------------------------------------------------------------|-----------------------------------------------|----------------------------------------------------------------------------------------|
| <b>Inflammation</b>                    |                                               |                                                                                        |                                               |                                                                                        |
| hsCRP ≥2mg/L,<br>Odds Ratio            | <b>0.98 ‡<br/>(0.97, 0.99)</b>                | <b>0.98 ‡<br/>(0.97, 0.99)</b>                                                         | <b>0.91 ‡<br/>(0.88 to 0.95)</b>              | <b>0.92 ‡<br/>(0.87 to 0.96)</b>                                                       |
| IL-6 ,<br>β-Coefficient †              | <b>-0.003<br/>(-0.005, -0.001)</b>            | <b>-0.003<br/>(-0.005, -0.001)</b>                                                     | <b>-0.02<br/>(-0.03 to -0.01)</b>             | <b>-0.01<br/>(-0.02 to -0.01)</b>                                                      |
| <b>Subclinical<br/>Atherosclerosis</b> |                                               |                                                                                        |                                               |                                                                                        |
| cIMT,<br>β-Coefficient                 | <b>-0.002<br/>(-0.004, -0.001)</b>            | -0.001<br>(-0.002, 0.001)                                                              | <b>-0.01<br/>(-0.02 to -0.004)</b>            | -0.003<br>(-0.01, 0.006)                                                               |
| CAC>0,<br>Odds Ratio,                  | <b>0.98 ‡<br/>(0.97, 0.99)</b>                | 0.99<br>(0.98, 1.00)                                                                   | <b>0.94 ‡<br/>(0.90 to 0.97)</b>              | 0.97<br>(0.92 to 1.01)                                                                 |
| ABI<1,<br>Odds Ratio                   | <b>0.98<br/>(0.97, 0.99)</b>                  | 0.99<br>(0.98, 1.00)                                                                   | <b>0.91<br/>(0.86 to 0.96)</b>                | 0.95<br>(0.89 to 1.01)                                                                 |

\*All values are expressed as Odds Ratios or β-Coefficients; with 95% confidence Intervals. Each robust linear and logistic model is adjusted for age, gender, race, MESA site, BMI, hypertension status, diabetes status , heart rate, LDL-C, HDL-C, triglycerides, treatment for dyslipidemia, family history of MI, and level of education. The pack-year adjustment then adds pack-years, as a continuous variable, to this model.

† Log-transformed

**Significant values (P<0.05) are presented in bold.**

**‡ P-value <0.001**

**Supplementary E-Table VI: Smoking status in subsamples of Cardiac MRI (N=3530) and Flow-Mediated Dilation (N=3027)**

|                             | Smoking Status |           |          | Total |
|-----------------------------|----------------|-----------|----------|-------|
|                             | Never          | Former    | Current  |       |
| <b>ENTIRE SAMPLE, n (%)</b> | 3218 (47)      | 2607 (38) | 971 (14) | 6796  |
| <b>IMAGING SUB-SAMPLES</b>  |                |           |          |       |
| <b>FMD, n (%)</b>           | 1450 (48)      | 1115 (38) | 422 (14) | 3027  |
| <b>Aortic MRI, n (%)</b>    | 1702 (49)      | 1296 (37) | 497 (14) | 3495  |

*FMD-Flow-Mediated Dilation, MRI=Magnetic Resonance Imaging*



**Supplementary E-Table VII: Effect Modification of Inflammation on the association between smoking and CAC; with and without adjustment for cumulative exposure**

|                                                     | Never Smokers                                                  | Former Smokers                                                                 | Current Smokers                                                                       |
|-----------------------------------------------------|----------------------------------------------------------------|--------------------------------------------------------------------------------|---------------------------------------------------------------------------------------|
| <b>Odds Ratio of CAC&gt;0</b>                       |                                                                |                                                                                |                                                                                       |
| If hsCRP <2 mg/L                                    | 1<br>(ref)                                                     | <b>1.32</b><br>( <b>1.11, 1.59</b> )<br><i>1.16 *</i><br>( <i>0.96, 1.41</i> ) | <b>1.58 §</b><br>( <b>1.21, 2.07</b> )<br><i>1.28 *</i><br>( <i>0.96, 1.71</i> )      |
| If hsCRP >2 mg/L                                    | 0.92<br>(0.77, 1.09)<br><i>0.92 *</i><br>( <i>0.77, 1.09</i> ) | <b>1.30</b><br>( <b>1.08, 1.57</b> )<br><i>1.11 *</i><br>( <i>0.90, 1.36</i> ) | <b>1.85 † §</b><br>( <b>1.45, 2.36</b> )<br><i>1.45 *, †</i><br>( <i>1.10, 1.90</i> ) |
| <b>Odds Ratio of CAC&gt;75<sup>th</sup> centile</b> |                                                                |                                                                                |                                                                                       |
| If hsCRP <2 mg/L                                    | 1<br>(ref)                                                     | 1.09<br>(0.86, 1.39)<br><i>1.01 *</i><br>( <i>0.79, 1.31</i> )                 | 0.95<br>(0.67, 1.36)<br><i>0.84 *</i><br>( <i>0.58, 1.22</i> )                        |
| If hsCRP >2 mg/L                                    | 0.86<br>(0.67-1.12)<br><i>0.86 *</i><br>( <i>0.67-1.12</i> )   | 1.13<br>(0.88, 1.45)<br><i>1.02 *</i><br>( <i>0.78, 1.33</i> )                 | <b>1.64 ‡</b><br>( <b>1.17, 2.29</b> )<br><i>1.39 *, †</i><br>( <i>0.96, 2.02</i> )   |

Never smokers with hsCRP<2mg/L are the referent group. Models adjusted for age, gender, race, MESA site, BMI, hypertension status, diabetes status, heart rate, LDL-C, HDL-C, triglycerides, treatment for dyslipidemia, family history of MI, and level of education.

\*Hierarchical model with additional adjustment for pack-years.

†Interaction of hsCRP on smoking and CAC>0, p=0.20 (Interaction p=0.30 when adjusted for pack-years). ‡Interaction of hsCRP on smoking and CAC>75<sup>th</sup> centile, p=0.01 (Interaction p=0.02 when adjusted for pack-years).

**Significant values (P<0.05) presented in bold.**

**§ P-value <0.001**

CAC>75<sup>th</sup> %= Coronary artery calcium greater than the 75<sup>th</sup> percentile for age and sex, CAC>0 AU= Coronary Artery Calcium greater than zero Agatston Units, FS=Former Smokers, CS=Current Smokers, hsCRP=high-sensitivity C-Reactive Protein

**Supplementary E-Table VIII: Effect Modification of Inflammation on the association between smoking and either CIMT or ABI <1.0**

|                                  | Never Smokers                         | Former Smokers                     | Current Smokers                           |
|----------------------------------|---------------------------------------|------------------------------------|-------------------------------------------|
| <b>Beta-coefficient CIMT</b>     |                                       |                                    |                                           |
| If hsCRP <2 mg/L                 | 1<br>(ref)                            | 0.015<br>(-0.001, 0.023)           | <b>0.026 §</b><br><b>(0.015, 0.039)</b>   |
| If hsCRP >2 mg/L                 | <b>0.011</b><br><b>(0.001, 0.023)</b> | 0.008<br>(-0.003, 0.194)           | <b>0.029 † §</b><br><b>(0.013, 0.044)</b> |
| <b>Odds Ratio of ABI &lt;1.0</b> |                                       |                                    |                                           |
| If hsCRP <2 mg/L                 | 1<br>(ref)                            | <b>1.52</b><br><b>(1.01, 2.30)</b> | <b>1.59 §</b><br><b>(1.22, 2.07)</b>      |
| If hsCRP >2 mg/L                 | 1.20<br>(0.91, 1.59)                  | 1.27<br>(0.97, 1.65)               | <b>3.32 ‡ §</b><br><b>(2.36, 4.40)</b>    |

Never smokers with hsCRP<2mg/L are the referent group. Models adjusted for age, gender, race, MESA site, BMI, hypertension status, diabetes status, heart rate, LDL-C, HDL-C, triglycerides, treatment for dyslipidemia, family history of MI, and level of education.

†Interaction of hsCRP on smoking and CIMT, p=0.02

‡Interaction of hsCRP on smoking and ABI<1.0, p=0.004

**Significant values (P<0.05) presented in bold.**

**§ P-value <0.001**

*CIMT=Carotid intima-media thickness, ABI=Ankle-Brachial Index., FS=Former Smokers, CS=Current Smokers, hsCRP=high-sensitivity C-Reactive Protein*

**Supplementary E-Table IX: Sensitivity Analysis evaluating the association between smoking status and hs-CRP outcomes, excluding persons with hs-CRP  $\geq 10$ mg/L (Compare to Table 2)**

|                                    | Smoking Status* |                                |                                 |
|------------------------------------|-----------------|--------------------------------|---------------------------------|
|                                    | Never Smokers   | Former Smokers                 | Current Smokers                 |
| <b>Inflammation</b>                |                 |                                |                                 |
| hsCRP $\geq 2$ mg/L,<br>Odds Ratio | 1 (ref)         | <b>1.19</b><br>(1.04 to 1.36)  | <b>1.74 ‡</b><br>(1.44 to 2.09) |
| hsCRP,<br>$\beta$ -Coefficient †   | 0 (ref)         | <b>0.06</b><br>(0.003 to 0.11) | <b>0.27 ‡</b><br>(0.20 to 0.34) |

\*All values are expressed as Odds Ratios or  $\beta$ -Coefficients; with 95% confidence Intervals. Each robust linear and logistic model is adjusted for age, gender, race, MESA site, BMI, hypertension status, diabetes status, heart rate, LDL-C, HDL-C, triglycerides, treatment for dyslipidemia, family history of MI, and level of education.

† Log-transformed

**Significant values (P<0.05) are presented in bold.**

**‡ P-value <0.001**
